# Supplementary material for: Electrochemical performance of CoSe2 with mixed phases decorated with N-doped rGO in potassium-ion batteries
Source: Royal Society of Chemistry journal article supplement (doi:10.1039/d2ra03608h), 2022-01-01
Supplement: d2ra03608h1.pdf [file d2ra03608h1.pdf]

## Supporting Information:

### **Electrochemical performance of CoSe<sub>2</sub> with mixed phases decorated with N-doped rGO in Potassium-ion batteries**

Hui Zheng<sup>b,#</sup>, Han-Shu Xu<sup>a,b,#,\*</sup>, Jiaping Hu<sup>b</sup>, Huimin Liu<sup>b</sup>, Lianwei Wei<sup>b</sup>, Shusheng Wu<sup>b</sup>, Jin Li<sup>b</sup>, Yuhu Huang<sup>b</sup> and Kaibin Tang<sup>a,b,\*</sup>

<sup>a</sup> Hefei National Research Center for Physical Sciences at the Microscale, University of Science and Technology of China, Hefei, 230026, People's Republic of China

<sup>b</sup> Department of Chemistry, University of Science and Technology of China, Hefei, 230026, People's Republic of China

#### **Corresponding authors**

[xhs@ustc.edu.cn](mailto:xhs@ustc.edu.cn)

[kbtang@ustc.edu.cn](mailto:kbtang@ustc.edu.cn)

## Experimental section

### 1. Material synthesis

In a usual procedure,  $\text{Co}(\text{NO}_3)_2 \cdot 6\text{H}_2\text{O}$  (55 mg) and PVP K-30 (350 mg) were added into deionized water (5 mL) and  $\text{CH}_2(\text{OH})_2$  (10 mL) with GO solution (2.93 mg/mL, 3.5 mL) to form a uniform suspension. Meanwhile, selenium powder (40 mg) was added into  $\text{C}_2\text{H}_4(\text{NH}_2)_2$  (10 mL) to obtain a black solution. Then, these mixtures were mixed for 4 h under magnetically stirring. Afterward, the melange was placed into a 50 mL autoclave for reacting at 200 °C in 24 h. After centrifuging and washing with ethanol and deionized water, the  $\text{CoSe}_2@\text{N-rGO}$  nanoparticles were collected by freeze-dried. The  $\text{CoSe}_2$  was prepared *via* a similar method with the synthesis of the  $\text{CoSe}_2@\text{N-rGO}$  product except adding GO solution.

### 2. Structural and morphological characterization

The powder X-ray diffraction (XRD) patterns were measured by using a SmartLab X-ray diffractometer (Cu-K $\alpha$ 1,  $\lambda = 1.5418\text{\AA}$ ). The scanning electron microscope (SEM) morphology were carried out by a field-emitting (FE) SEM (JEOL-JSM-6700F). Thermogravimetric analysis (TGA) was performed on a thermogravimetric analyser (GA Q5000IR) from 30 °C to 700 °C in air flow (50 mL/min) with a heating rate of 10 °C/min. The surface chemical state was determined by X-ray photoelectron spectroscopy (XPS, Thermo ESCALAB 250Xi), using Al K $\alpha$  radiation. The Raman spectra were obtained using a Raman spectrophotometer (Horiba Jobin Yvon, HR800, France) in the range of 200-1800  $\text{cm}^{-1}$  with 532 nm laser radiation. Brunauer–Emmett–Teller (BET) measurement was conducted in Quantachrome system with  $\text{N}_2$  adsorption and desorption. High-resolution TEM (HRTEM) and energy-dispersive X-ray spectroscopy (EDX) mapping analyses were executed on a Talos F200X HRTEM supplied with a spherical aberration corrector.

### 3. Electrochemical tests

$\text{CoSe}_2@\text{N-rGO}$  as an anode material for PIBs were assembled into CR 2032 coin-type half cells to investigate the electrochemical behavior. The working electrode was prepared by mixing 80 wt % active material with 10 wt % Super-p and 10 wt % CMC in water. The mixed slurry was coated on the copper foil and dried at 80 °C for 10 h in a vacuum oven. The mass loading of active materials was 0.96-1.17  $\text{mg cm}^{-2}$ . The thin K metal sheet was used as the counter electrode and a GF/D glass microfiber was served as the separator. Moreover, a 1.0 M potassium bis(fluorosulfonyl)imide (KFSI) solution of dimethyl ether (DME) was applied as the electrolyte. The whole processes of battery making were carried out in a glove box filled with Ar gas ( $\text{O}_2 \leq 0.01$  ppm;  $\text{H}_2\text{O} \leq 0.01$  ppm). The electrochemical properties of electrodes were tested based on a multichannel battery testing system (Neware-BTS-TC53). The cyclic voltammograms (CV) at various scan rates and electrochemical impedance spectroscopy (EIS) in the frequency range of 0.01-100000 Hz were examined on an electrochemical workstation (CHI660E).

### 4. DFT Calculations

DFT calculations were performed using the CASTEP code of Materials Studio package of AccelrysInc<sup>1</sup>. Generalized gradient approximation (GGA) method and Perdew-Burke-Ernzerhof (PBE) functional were used to calculate the DFT exchange correlation energy. The core electrons were treated by ultra-soft pseudopotential (USP). The kinetic energy cutoff was set to 400 eV for

the plane-wave basis set and the self-consistent field (SCF) tolerance was  $1 \times 10^{-6}$  eV.  $5 \times 3 \times 1$  CoSe<sub>2</sub> surface built with a 20 Å vacuum region. The Brillouin zone was sampled by  $4 \times 4 \times 1$  Monkhorst-Pack mesh *k*-point for surface calculation and the DOS calculation.

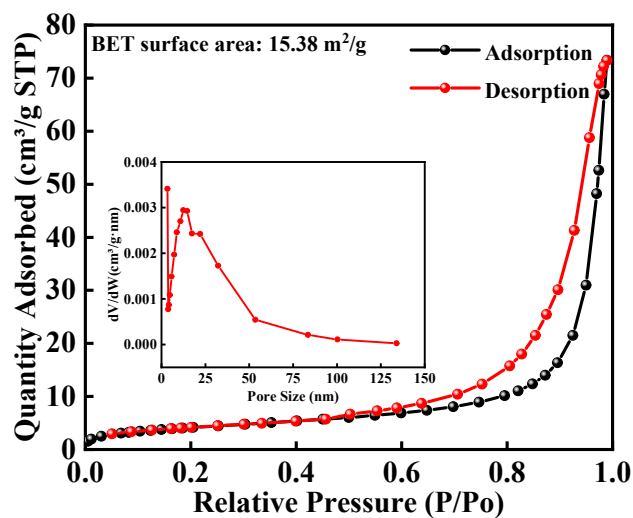

**Fig. S1** Nitrogen adsorption/desorption profile and corresponding pore size distribution (inset map) of CoSe<sub>2</sub>.

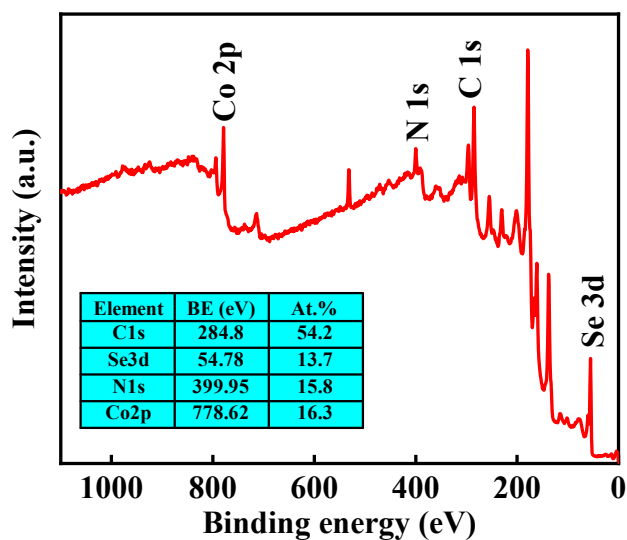

**Fig. S2** XPS survey spectra of CoSe<sub>2</sub>@N-rGO.

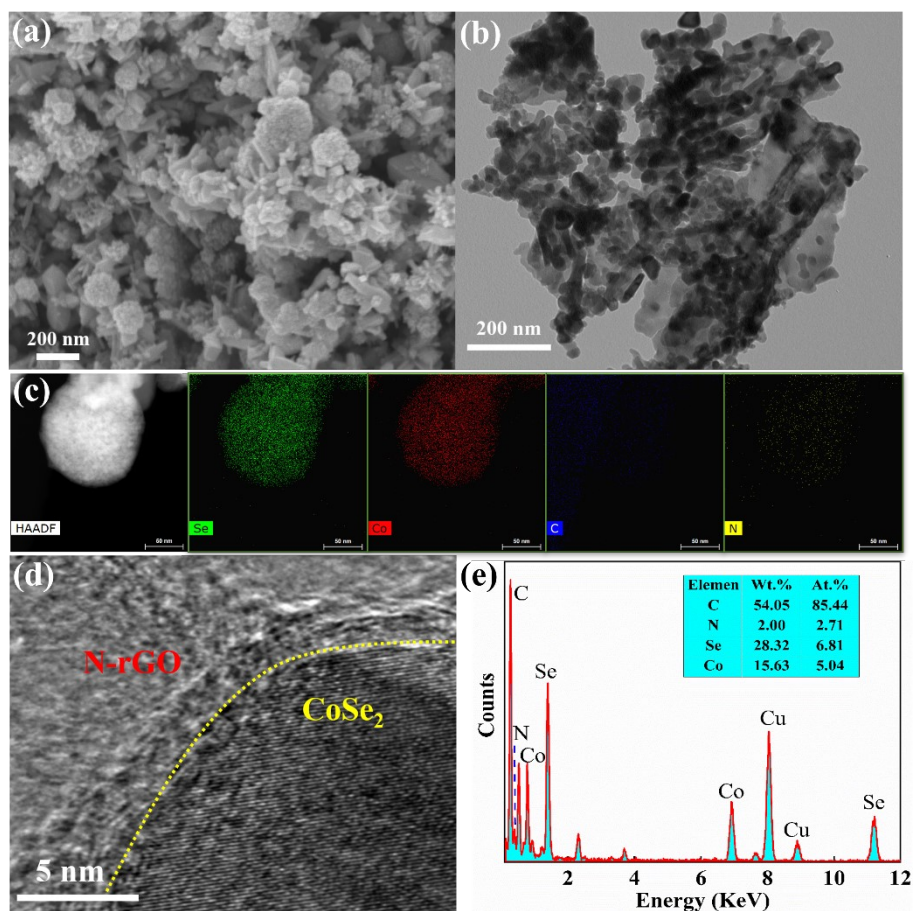

**Fig. S3** (a-d) SEM, TEM, and EDS mapping of as-synthesized  $\text{CoSe}_2$ , (d) and (e) high-resolution TEM images and EDX spectra of as-synthesized  $\text{CoSe}_2$ @N-rGO. The signals of Cu in the spectrum comes from the copper grid.

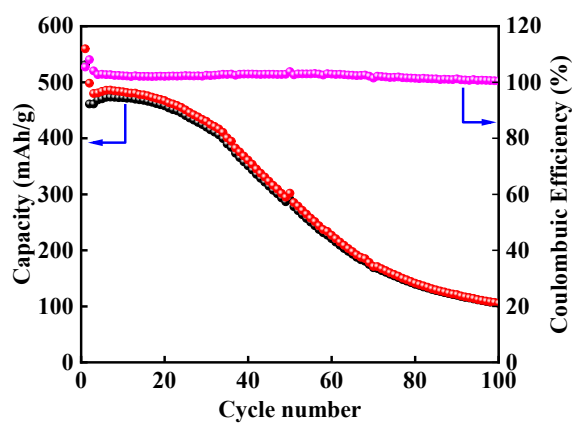

**Fig. S4** Galvanostatic charge/discharge Capacity and Coulombic efficiency at a current density of  $0.2 \text{ A} \cdot \text{g}^{-1}$  except for the initial cycle at  $0.05 \text{ A} \cdot \text{g}^{-1}$  of  $\text{CoSe}_2$ .

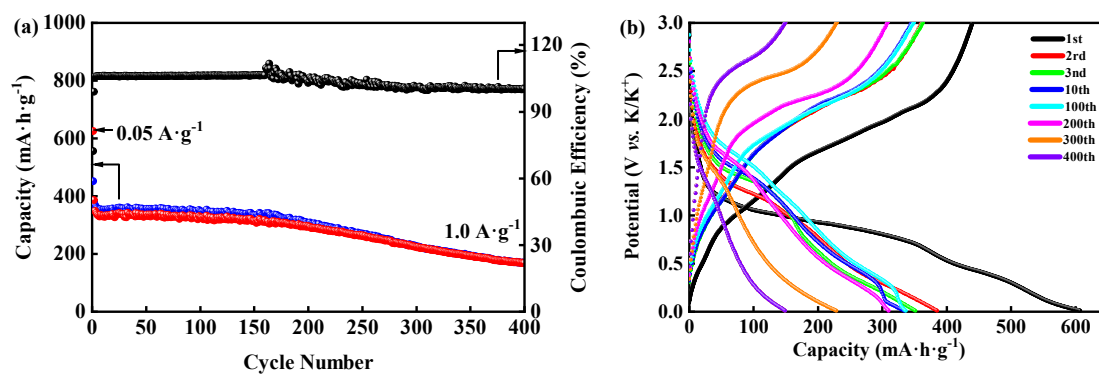

**Fig. S5** (a) Long-term cycling stability and Coulombic efficiency of  $\text{CoSe}_2@\text{N-rGO}$  composites at a high current density of  $1 \text{ A}\cdot\text{g}^{-1}$  except for the initial cycle at  $0.05 \text{ A}\cdot\text{g}^{-1}$ , (b) Charge/Discharge curves at  $0.05 \text{ A}\cdot\text{g}^{-1}$  for initial cycle and 2<sup>nd</sup>, 3<sup>rd</sup>, 10<sup>th</sup>, 100<sup>th</sup>, 200<sup>th</sup>, 300<sup>th</sup> and 400<sup>th</sup> at  $1 \text{ A}\cdot\text{g}^{-1}$ .

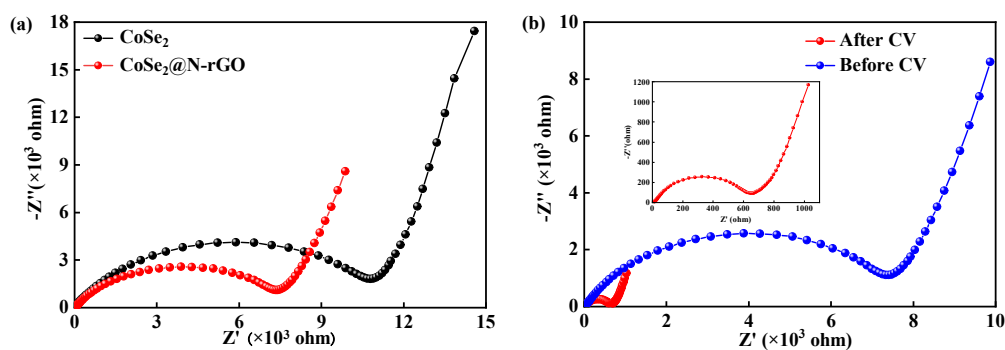

**Fig. S6** (a) Comparison of electrochemical impedance spectroscopy (EIS) analysis of PIBs of both  $\text{CoSe}_2$  electrode and  $\text{CoSe}_2@\text{N-rGO}$  electrodes; (b) Comparison of electrochemical impedance spectroscopy (EIS) analysis of fresh  $\text{CoSe}_2@\text{N-rGO}$  electrodes and cycled after CV.

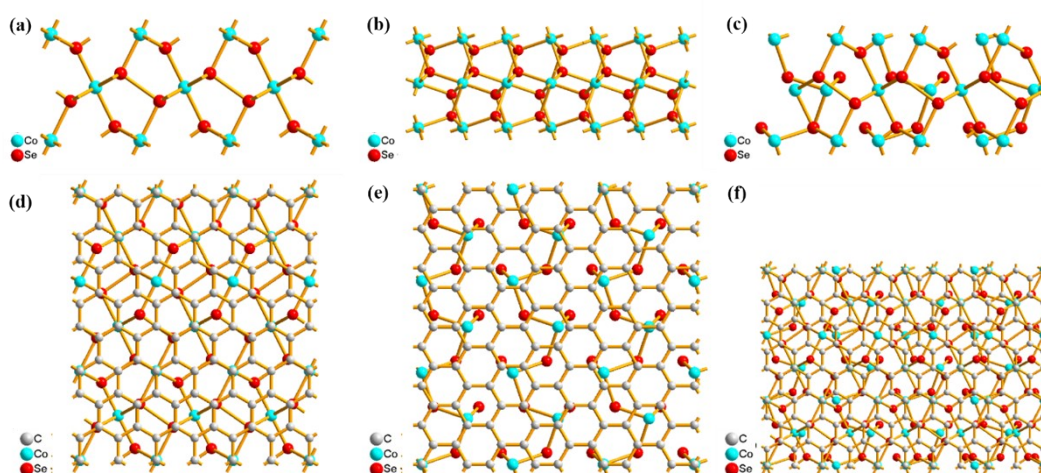

**Fig.S7** The (001) surface image of (a) o- $\text{CoSe}_2$ , (b) c- $\text{CoSe}_2$  and (c) o- $\text{CoSe}_2/$  c- $\text{CoSe}_2$ , (d) o- $\text{CoSe}_2@\text{N-rGO}$ , (e) c- $\text{CoSe}_2@\text{N-rGO}$  and (f) o- $\text{CoSe}_2/$  c- $\text{CoSe}_2@\text{N-rGO}$ . Here, o- $\text{CoSe}_2$  represent orthorhombic  $\text{CoSe}_2$  and c- $\text{CoSe}_2$  represent cubic  $\text{CoSe}_2$

**Table S1.** The electrochemical performance of CoSe<sub>2</sub>@N-rGO and other anode materials for potassium-ion storage.

| Materials                                              | Cs (mA h/g) | Current density (A g <sup>-1</sup> ) | Cycles (times) | Voltage Range (V vs. K <sup>+</sup> /K) | Crystal system       | Ref.     |
|--------------------------------------------------------|-------------|--------------------------------------|----------------|-----------------------------------------|----------------------|----------|
| CoSe <sub>2</sub> -MoSe <sub>2</sub> /rGO              | 498         | 0.1                                  | 60             | 0.01-3                                  | Orthorhombic         | 2        |
| CoSe <sub>2</sub> ⊂SPNC⊂rGO                            | 208.8       | 0.5                                  | 500            | 0.01-3                                  | Orthorhombic         | 3        |
| CoSe <sub>2</sub> @NC/MX                               | 358         | 0.5                                  | 100            | 0.01-3                                  | Cubic                | 4        |
|                                                        | 276         | 2.0                                  |                |                                         |                      |          |
| Ni <sub>5</sub> Se <sub>4</sub> /CoSe <sub>2</sub> @C  | 330.1       | 0.1                                  | 200            | 0.01-3                                  | Cubic                | 5        |
| CoSe <sub>2</sub> @NC                                  | 311.3       | 0.05                                 | 1000           | 0.01-2.5                                | Cubic                | 6        |
|                                                        | 184.5       | 0.5                                  |                |                                         |                      |          |
| CoSe <sub>2</sub> @NC/rGO                              | 226         | 0.5                                  | 400            | 0.01-2.5                                | Cubic & Orthorhombic | 7        |
| CoSe <sub>2</sub> @NC/HMCS                             | 442         | 0.1                                  | 120            | 0.01-3                                  | Cubic & Orthorhombic | 8        |
| CoSe <sub>2</sub> threaded by N-doped carbon nanotubes | 253         | 0.2                                  | 100            | 0.01-3                                  | /                    | 9        |
|                                                        | 173         | 2.0                                  | 600            | 0.01-3                                  |                      |          |
| CoSe@NCNTs                                             | 282         | 0.2                                  | 500            | 0.01-3                                  | /                    | 10       |
| CoSe@NrGo                                              | 143         | 0.2                                  | 100            | 0.01-3                                  | /                    | 11       |
| CoSe@NC                                                | 309.6       | 0.2                                  | 500            | 0.01-3                                  | /                    | 12       |
| CoSe@C/HCPs                                            | 182         | 0.3                                  | 300            | 0.01-3                                  | /                    | 13       |
| Co <sub>0.85</sub> Se-QDs/C                            | 402         | 0.05                                 | 50             | 0.01-2.5                                | /                    | 14       |
| Co <sub>0.85</sub> Se@NC                               | 114.7       | 2.0                                  | 250            | 0.01-3                                  | /                    | 15       |
| CoSe <sub>2</sub> @N-rGO                               | 421         | 0.2                                  | 100            | 0.01-3                                  | Orthorhombic & Cubic | Our work |
|                                                        | 174.69      | 1.0                                  | 400            |                                         |                      |          |

**Table S2.** The electrochemical performance of CoSe<sub>2</sub>-derived anode materials for sodium-ion storage with difference crystal system

| Materials                                                           | Cs (mA h/g) | Current density (A g <sup>-1</sup> ) | Cycles (times) | Voltage Range (V vs. K <sup>+</sup> /K) | Crystal system       | Ref. |
|---------------------------------------------------------------------|-------------|--------------------------------------|----------------|-----------------------------------------|----------------------|------|
| CoSe <sub>2</sub> @CNTs–MXene                                       | 400         | 2                                    | 200            | 0.1-3                                   | Cubic                | 16   |
| CoSe <sub>2</sub> @NC                                               | 395         | 0.5                                  | 200            | 0.01-3                                  | Cubic                | 17   |
|                                                                     | 367         | 2                                    |                |                                         |                      |      |
| CoSe <sub>2</sub> HBs/Ti <sub>3</sub> C <sub>2</sub> T <sub>x</sub> | 186         | 0.5                                  | 3000           | 0.01-3                                  | Cubic                | 18   |
| Cu-doped CoSe <sub>2</sub> microboxes                               | 492         | 0.05                                 | /              | 0.01-3                                  | Cubic                | 19   |
| undoped CoSe <sub>2</sub> microboxes                                | 480         | 0.05                                 | /              |                                         |                      |      |
| TNC-CoSe <sub>2</sub> microcubes                                    | 511         | 0.2                                  | 200            | 0.01-3                                  | Cubic                | 20   |
|                                                                     | 456         | 6.4                                  | 6000           |                                         |                      |      |
| N-CoSe <sub>2</sub> yss                                             | 431         | 0.05                                 | /              | 0.01-3                                  | Cubic                | 21   |
| Submicron Cobblestone-Like                                          | 414.6       | 0.2                                  | 700            | 0.5-3                                   | Cubic                | 22   |
| Carbon-Free CoSe <sub>2</sub>                                       | 416.5       | 2.0                                  | 1350           |                                         |                      |      |
| CoSe <sub>2</sub> /Mo <sub>2</sub> C/C NFs                          | 530.7       | 0.1                                  | 100            | 0.01-3                                  | Cubic                | 23   |
| CoSe <sub>2</sub> /ZnSe@C nanospheres                               | 395         | 0.1                                  | /              | 0.5-3                                   | Orthorhombic         | 24   |
| N-CNT/rGO/CoSe <sub>2</sub> NF                                      | 448         | 1.0                                  | 300            | 0.01-3                                  | Orthorhombic         | 25   |
| V-shaped CoSe <sub>2</sub> @GR                                      | 549.4       | 0.1                                  | /              | 0.01-3                                  | Orthorhombic         | 26   |
| CoSe <sub>2</sub> @C@NC                                             | 324         | 0.1                                  | 200            | 0.5-3                                   | Orthorhombic         | 27   |
|                                                                     | 234         | 5.0                                  | 2000           |                                         |                      |      |
| multilayered yolk-shell CoSe <sub>2</sub> nano-dodecahedrons        | 352.9       | 1.0                                  | 2000           | 0.01-3                                  | Orthorhombic         | 28   |
| P-CoSe <sub>2</sub>                                                 | 206.9       | 2.0                                  | 1000           | 0.01-3                                  | Orthorhombic         | 29   |
| CS@PCNFs                                                            | 413.6       | 0.2                                  | 150            | 0.01-3                                  | Orthorhombic         | 30   |
|                                                                     | 401.5       | 2.0                                  | /              |                                         |                      |      |
| CoSe <sub>2</sub> @N-CF/CNTs                                        | 428         | 1.0                                  | 500            | 0.01-3                                  | Orthorhombic         | 31   |
| CNT/CoSe <sub>2</sub> @NC                                           | 404         | 0.2                                  | 120            | 0.01-3                                  | Cubic & Orthorhombic | 32   |
| CoSe <sub>2</sub> @NPGC/CNTs                                        | 424         | 0.2                                  | 100            | 0.01-3                                  | Cubic & Orthorhombic | 33   |
| CoSe <sub>2</sub> @AC                                               | 100         | 0.2                                  |                |                                         |                      |      |

## References

- (1) Clark, S. J.; Segall, M. D.; Pickard, C. J.; Hasnip, P. J.; Probert, M. I.; Refson, K.; Payne, M. C. First principles methods using CASTEP. *Zeitschrift für kristallographie-crystalline materials* **2005**, *220*, 567-570.
- (2) Xu, Y.; Liu, X.; Su, H.; Jiang, S.; Zhang, J.; Li, D. Hierarchical Bimetallic Selenides CoSe<sub>2</sub>-MoSe<sub>2</sub>/rGO for Sodium/Potassium-Ion Batteries Anode: Insights into the Intercalation and Conversion Mechanism. *Energy & Environmental Materials* **2022**, *5*, 627-636.
- (3) Zhao, Z.; Gao, C.; Fan, J.; Shi, P.; Xu, Q.; Min, Y. Dual Confinement of CoSe<sub>2</sub> Nanorods with Polyphosphazene-Derived Heteroatom-Doped Carbon and Reduced Graphene Oxide for Potassium-Ion Batteries. *ACS Omega* **2021**, *6*, 17113-17125.
- (4) Oh, H. G.; Yang, S. H.; Kang, Y. C.; Park, S. K. N-doped carbon-coated CoSe<sub>2</sub> nanocrystals anchored on two-dimensional MXene nanosheets for efficient electrochemical sodium-and potassium-ion storage. *International Journal of Energy Research* **2021**, *45*, 17738-17748.
- (5) Zhang, Y.; Wei, S.; Zhao, Z.; Pei, X.; Zhao, W.; Wang, J.; Du, X.; Li, D. Carbon-Encapsulated Ni<sub>3</sub>Se<sub>4</sub>/CoSe<sub>2</sub> Heterostructured Nanospheres: Sodium/Potassium-Ion Storage Anode with Prominent Electrochemical Properties. *Small* **2022**, e2107258.
- (6) Hu, J.; Wang, B.; Yu, Q.; Zhang, D.; Zhang, Y.; Li, Y.; Wang, W. A. CoSe<sub>2</sub>/N-doped carbon porous nanoframe as an anode material for potassium-ion storage. *Nanotechnology* **2020**, *31*, 395403.
- (7) Zhao, J.; Wu, H.; Li, L.; Lu, S.; Mao, H.; Ding, S. A CoSe<sub>2</sub>-based 3D conductive network for high-performance potassium storage: enhancing charge transportation by encapsulation and restriction strategy. *Materials Chemistry Frontiers* **2021**, *5*, 5351-5360.
- (8) Yang, S. H.; Park, S. K.; Kang, Y. C. MOF-Derived CoSe<sub>2</sub>@N-Doped Carbon Matrix Confined in Hollow Mesoporous Carbon Nanospheres as High-Performance Anodes for Potassium-Ion Batteries. *Nanomicro Lett* **2021**, *13*, 1-15.
- (9) Yu, Q.; Jiang, B.; Hu, J.; Lao, C. Y.; Gao, Y.; Li, P.; Liu, Z.; Suo, G.; He, D.; Wang, W. A.; Yin, G. Metallic Octahedral CoSe<sub>2</sub> Threaded by N-Doped Carbon Nanotubes: A Flexible Framework for High-Performance Potassium-Ion Batteries. *Adv Sci* **2018**, *5*, 1800782.
- (10) Liu, Y.; Deng, Q.; Li, Y.; Li, Y.; Zhong, W.; Hu, J.; Ji, X.; Yang, C.; Lin, Z.; Huang, K. CoSe@N-Doped Carbon Nanotubes as a Potassium-Ion Battery Anode with High Initial Coulombic Efficiency and Superior Capacity Retention. *ACS Nano* **2021**, *15*, 1121-1132.
- (11) Liu, Y.; Cui, K.; Ma, Z.; Wang, X. Pseudocapacitance-Induced High-Rate Potassium Storage in CoSe@NrGo Hybrid Nanosheets for Potassium-Ion Batteries. *Energy & Fuels* **2020**, *34*, 10196-10202.
- (12) Huang, Q.; Fan, X.; Ou, X.; Wang, H.; Wu, L.; Yang, C. Fabrication of CoSe@NC nanocubes for high performance potassium ion batteries. *J Colloid Interface Sci* **2021**, *604*, 157-167.
- (13) Zhang, Z.; Zhang, B.; Xu, J.; Zhang, M.; Duan, L.; Shen, J.; Zhou, X. Anchoring Carbon-Coated CoSe Nanoparticles on Hollow Carbon Nanocapsules for Efficient Potassium Storage. *ACS Applied Energy Materials* **2021**, *4*, 6356-6363.
- (14) Liu, Z.; Han, K.; Li, P.; Wang, W.; He, D.; Tan, Q.; Wang, L.; Li, Y.; Qin, M.; Qu, X. Tuning Metallic Co<sub>0.85</sub>Se Quantum Dots/Carbon Hollow Polyhedrons with Tertiary Hierarchical Structure for High-Performance Potassium Ion Batteries. *Nanomicro Lett* **2019**, *11*, 1-14.
- (15) Ma, G.; Li, C.; Liu, F.; Majeed, M. K.; Feng, Z.; Cui, Y.; Yang, J.; Qian, Y. Metal-organic framework-derived Co<sub>0.85</sub>Se nanoparticles in N-doped carbon as a high-rate and long-lifespan anode material for potassium ion batteries. *Materials Today Energy* **2018**, *10*, 241-248.
- (16) Xu, E.; Li, P.; Quan, J.; Zhu, H.; Wang, L.; Chang, Y.; Sun, Z.; Chen, L.; Yu, D.; Jiang, Y.



Dimensional Gradient Structure of CoSe<sub>2</sub>@CNTs-MXene Anode Assisted by Ether for High-Capacity, Stable Sodium Storage. *Nanomicro Lett* **2021**, 13, 1-14.

(17) Liu, T.; Li, Y.; Hou, S.; Yang, C.; Guo, Y.; Tian, S.; Zhao, L. Building Hierarchical Microcubes Composed of One-Dimensional CoSe<sub>2</sub>@ Nitrogen-Doped Carbon for Superior Sodium Ion Batteries. *Chemistry-A European Journal* **2020**, 26, 13716-13724.

(18) Zhang, L.; Liu, W.; Ma, Q.; Xu, Y.; Liu, Z.; Wang, G. Electrostatic self-assembly synthesis of CoSe<sub>2</sub> HBs/ Ti<sub>3</sub>C<sub>2</sub>T<sub>x</sub> composites for long-cycle-life sodium ion batteries. *ChemElectroChem* **2021**, 8, 4047-4053.

(19) Fang, Y.; Yu, X. Y.; Lou, X. W. D. Formation of Hierarchical Cu-Doped CoSe<sub>2</sub> Microboxes via Sequential Ion Exchange for High-Performance Sodium-Ion Batteries. *Adv Mater* **2018**, 30, e1706668.

(20) Zhao, H.; Qi, Y.; Liang, K.; Li, J.; Zhou, L.; Chen, J.; Huang, X.; Ren, Y. Interface-Driven Pseudocapacitance Endowing Sandwiched CoSe<sub>2</sub>/N-Doped Carbon/TiO<sub>2</sub> Microcubes with Ultra-Stable Sodium Storage and Long-Term Cycling Stability. *ACS Appl Mater Interfaces* **2021**, 13, 61555-61564.

(21) Geng, J.; Zhang, S.; Ang, E. H.; Guo, J.; Jin, Z.; Li, X.; Cheng, Y.; Dong, H.; Geng, H. Modulating the kinetics of CoSe<sub>2</sub> yolk-shell spheres via nitrogen doping with high pseudocapacitance toward ultra-high-rate capability and high-energy density sodium-ion half/full batteries. *Materials Chemistry Frontiers* **2021**, 5, 6873-6882.

(22) Liu, T.; Hou, S.; Li, Y.; Guo, Y.; Yang, C.; Zhao, L. Tailoring Submicron Cobblestone-Like Carbon-Free CoSe<sub>2</sub> with High Energy Density for Sodium-Ion Batteries. *ACS Applied Energy Materials* **2020**, 3, 9558-9567.

(23) Yang, J.; Yuan, W.; Zhou, X.; Zhang, Y.; Zheng, Y.; Yan, Q.; Liu, Y.; Dong, X. Nano-confined CoSe<sub>2</sub>/Mo<sub>2</sub>C nanoparticles encapsulated into porous carbon nanofibers for superior lithium and sodium storage. *Materials Today Energy* **2018**, 10, 317-324.

(24) Xiao, D.; Liu, S.; Zhao, K.; Ye, G.; Su, Y.; Zhu, W.; He, Z. Metal-organic framework-derived ultrasmall nitrogen-doped carbon-coated CoSe<sub>2</sub>/ZnSe nanospheres as enhanced anode materials for sodium-ion batteries. *Ionics* **2021**, 27, 3327-3337.

(25) Jo, M. S.; Lee, J. S.; Jeong, S. Y.; Kim, J. K.; Kang, Y. C.; Kang, D. W.; Jeong, S. M.; Cho, J. S. Golden Bristlegrass-Like Hierarchical Graphene Nanofibers Entangled with N-Doped CNTs Containing CoSe<sub>2</sub> Nanocrystals at Each Node as Anodes for High-Rate Sodium-Ion Batteries. *Small* **2020**, 16, e2003391.

(26) Xiao, Y.; Zhang, J.; Su, D.; Zhang, A.; Jin, Q.; Zhou, L.; Wu, S.; Wang, X.; Chen, W.; Fang, S. *In-situ* growth of V-shaped CoSe<sub>2</sub> nanorods on graphene with C-Co bonding for high-rate and long-life sodium-ion batteries. *Journal of Alloys and Compounds* **2020**, 819, 153359.

(27) Li, B.; Liu, Y.; Jin, X.; Jiao, S.; Wang, G.; Peng, B.; Zeng, S.; Shi, L.; Li, J.; Zhang, G. Designed Formation of Hybrid Nanobox Composed of Carbon Sheathed CoSe<sub>2</sub> Anchored on Nitrogen-Doped Carbon Skeleton as Ultrastable Anode for Sodium-Ion Batteries. *Small* **2019**, 15, e1902881.

(28) Liang, H.; Li, X.; Liu, X.; Sun, R.; Qin, Z.; Zhang, Y.; Fan, H. Epitaxial growth induced multilayer yolk-shell structured CoSe<sub>2</sub> with promoting transport kinetics of sodium ion half/full batteries. *Journal of Power Sources* **2022**, 517, 230729.

(29) Ye, J.; Li, X.; Xia, G.; Gong, G.; Zheng, Z.; Chen, C.; Hu, C. P-doped CoSe<sub>2</sub> nanoparticles embedded in 3D honeycomb-like carbon network for long cycle-life Na-ion batteries. *Journal of Materials Science & Technology* **2021**, 77, 100-107.

(30) Li, F.; Li, L.; Yao, T.; Liu, T.; Zhu, L.; Li, Y.; Lu, H.; Qian, R.; Liu, Y.; Wang, H. Electrospinning synthesis of porous carbon nanofiber supported CoSe<sub>2</sub> nanoparticles towards enhanced sodium ion

storage. *Materials Chemistry and Physics* **2021**, 262, 124314.

(31) Yang, J.; Gao, H.; Men, S.; Shi, Z.; Lin, Z.; Kang, X.; Chen, S. CoSe<sub>2</sub> Nanoparticles Encapsulated by N-Doped Carbon Framework Intertwined with Carbon Nanotubes: High-Performance Dual-Role Anode Materials for Both Li- and Na-Ion Batteries. *Adv Sci* **2018**, 5, 1800763.

(32) Yousaf, M.; Chen, Y.; Tabassum, H.; Wang, Z.; Wang, Y.; Abid, A. Y.; Mahmood, A.; Mahmood, N.; Guo, S.; Han, R. P. S.; Gao, P. A Dual Protection System for Heterostructured 3D CNT/CoSe<sub>2</sub>/C as High Areal Capacity Anode for Sodium Storage. *Adv Sci* **2020**, 7, 1902907.

(33) Park, S.-K.; Kim, J. K.; Kang, Y. C. Excellent sodium-ion storage performances of CoSe<sub>2</sub> nanoparticles embedded within N-doped porous graphitic carbon nanocube/carbon nanotube composite. *Chemical Engineering Journal* **2017**, 328, 546-555.

(34) Cui, C.; Wei, Z.; Zhou, G.; Wei, W.; Ma, J.; Chen, L.; Li, C. Quasi-reversible conversion reaction of CoSe<sub>2</sub>/nitrogen-doped carbon nanofibers towards long-lifetime anode materials for sodium-ion batteries. *Journal of Materials Chemistry A* **2018**, 6, 7088-7098.
